# Supplementary material for: PAM-flexible dual base editor-mediated random mutagenesis and self-activation strategies to improve CRISPRa potency
Source: PubMed Central journal article supplement — Mol Ther Methods Clin Dev. 2022 May 29;26:26–37. doi: 10.1016/j.omtm.2022.05.005 (PMC9198377; doi:10.1016/j.omtm.2022.05.005), 2022-05-29
Supplement: mmc1.pdf [file mmc1.pdf]

**OMTM, Volume 26**

**Supplemental information**

**PAM-flexible dual base editor-mediated random  
mutagenesis and self-activation  
strategies to improve CRISPRa potency**

**Cia-Hin Lau, Siping Huang, Raymond H.W. Lam, and Chung Tin**

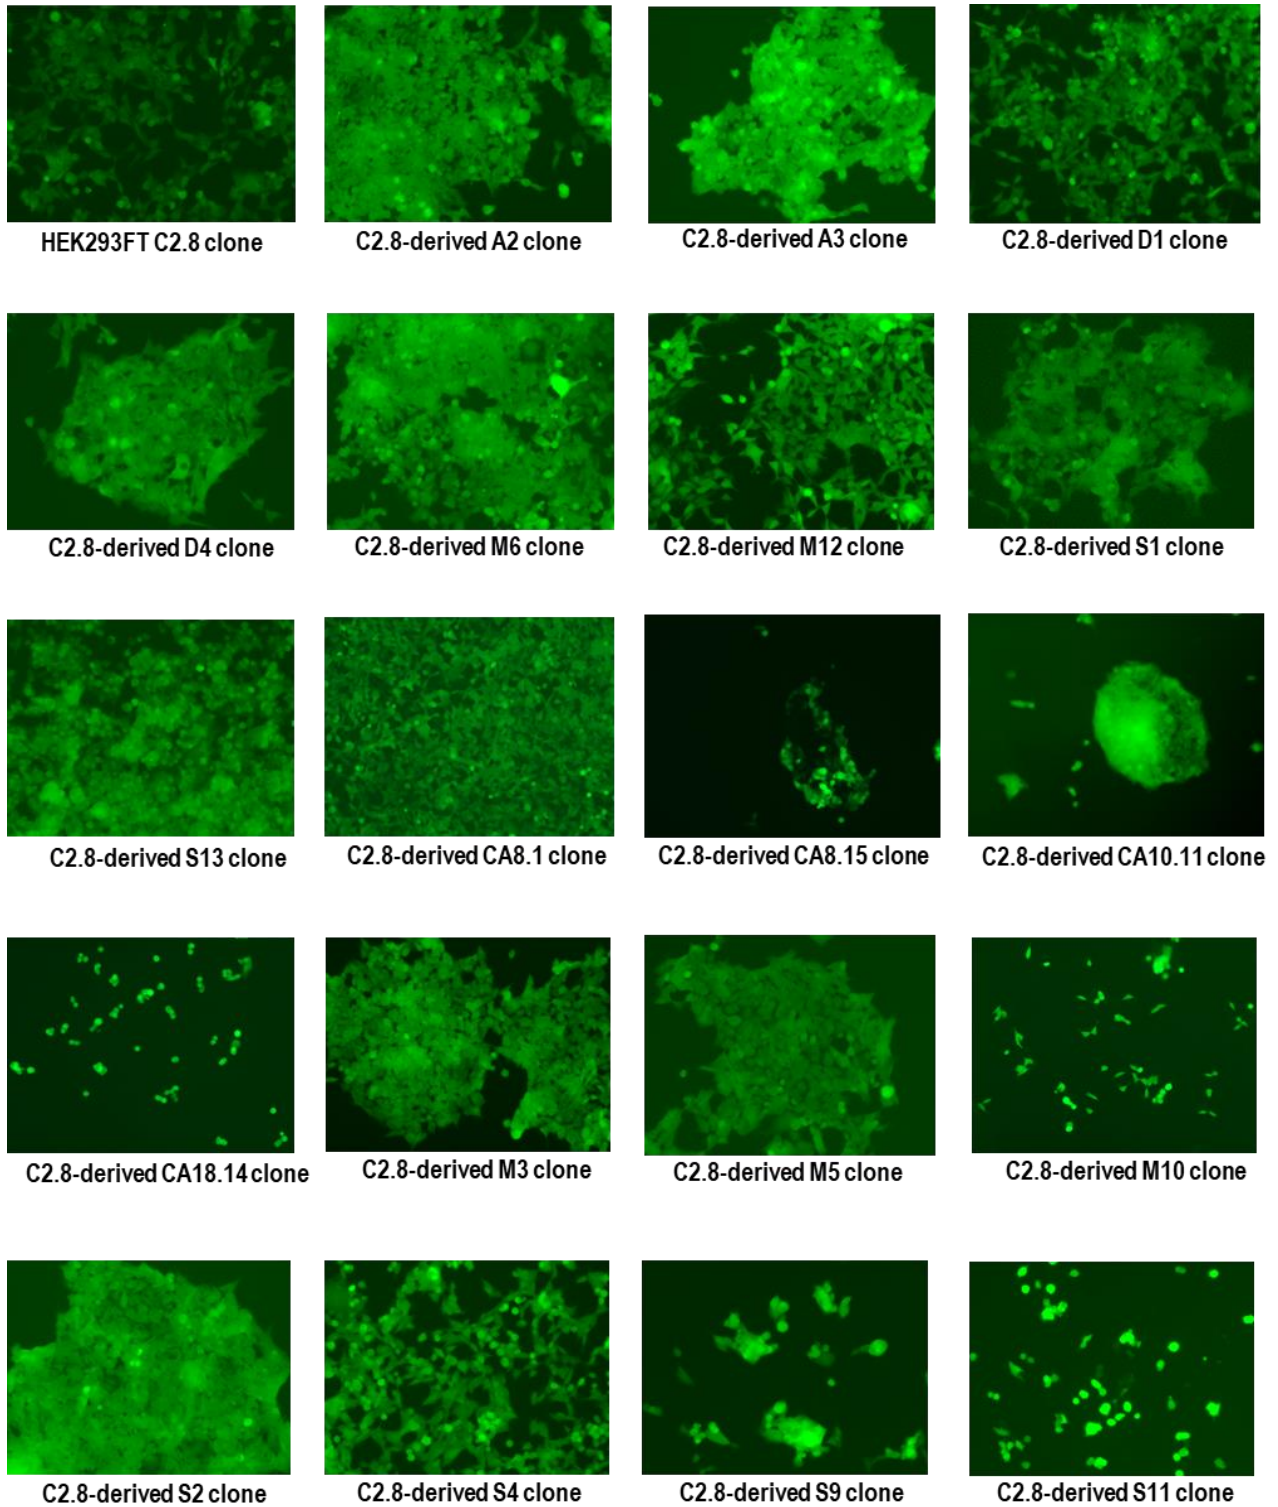

**Supplementary Figure S1. Generation of VP64-mutated clones from HEK293FT C2.8 cells.** These GFP-positive cells are expressing CRISPRa (pTK-dSaCas9-VP64-2A-GFP-spA-pU6-sgRNA) that may carry mutated VP64 transgene.

**Table S1. Primers used for donor pTK-dSaCas9-VP64-2A-GFP-pU6-sgRNA construction**

| Primer sequence (5' to 3')<br>(forward, FP; reverse, RP)                                   | Amplicon<br>size (bp) | Description                                                                            |
|--------------------------------------------------------------------------------------------|-----------------------|----------------------------------------------------------------------------------------|
| FP: CACC GACTCGGGCGGGTCGCGCGCCC<br>RP: AAAC GGGCGCGCGACCCGCCCGAGTC                         | -                     | for designing sgRNA of CRISPRa to target TK promoter                                   |
| FP: AAAA TCTAGA AAAA CTCGAG AAATGAGTCTTCGGACCTCGC<br>RP: AAAA ACCGGT TTAAGCGGGTCGCTGCAGGGT | 753                   | PCR TK promoter with added XbaI and XhoI sites<br>PCR TK promoter with added AgeI site |
| FP: AAAA TCTAGA TGCTTTCTCTGACCAGCATTCTCTCC<br>RP: AAAA CTCGAG CTGTCCCTAGTGGCCCCACTGTG      | 814                   | PCR left homology arm from genomic AAVS1 of HEK293FT                                   |
| FP: AAAA GCGGCCGC GATTGGTGACAGAAAAGCCCCATC<br>RP: AAAA GCGGCCGC AGAGCAGAGCCAGGAACCCCTG     | 821                   | PCR right homology arm from genomic AAVS1 of HEK293FT                                  |
| FP: GCATATACGATACAAGGCTGTTAGAGAG                                                           | -                     | for sequencing pU6-sgRNA                                                               |

**Table S2. Primers used for knock-in of donor pTK-CRISPRa-GFP into genomic *AAVS1* locus**

| Primer sequence (5' to 3')<br>(forward, FP; reverse, RP)       | Amplicon<br>size (bp) | Description                                                                       |
|----------------------------------------------------------------|-----------------------|-----------------------------------------------------------------------------------|
| FP: CACC GGGGCCACTAGGGACAGGAT<br>RP: AAAC ATCCTGTCCCTAGTGGCCCC | -                     | for designing sgRNA of SpCas9 to target genomic <i>AAVS1</i> locus                |
| FP: CGCGATCACATGGTCCTGCT<br>RP: CCAAGCAGTCACCCACAGTTG          | 1.5k                  | for verifying targeted integration of pTK-CRISPRa into genomic <i>AAVS1</i> locus |
| FP: CTGAACGCCCATCTGGACATCAC<br>RP: CGCTCCTGGACGTAGCCTTCG       | 1076                  | PCR dSaCas9-VP64-2A-GFP                                                           |
| FP: AAATGAGTCTTCGGACCTCGC<br>RP: GTAGCCCACGCTGGTGATGC          | 867                   | PCR pTK-dSaCas9                                                                   |
| FP: GTAGCCCACGCTGGTGATGC                                       | -                     | for sequencing HL( <i>AAVS1</i> ) and pTK                                         |
| FP: GACAATCGCCTCCAAGACCCAG                                     | -                     | for sequencing VP64-2A-GFP                                                        |
| FP: GCATATACGATACAAGGCTGTTAGAGAG                               | -                     | for sequencing pU6-sgRNA                                                          |

**Table S3. Primers used for VP64 mutagenesis**

| Primer sequence (5' to 3')<br>(forward, FP; reverse, RP)        | Amplicon<br>size (bp) | Description                                                        |
|-----------------------------------------------------------------|-----------------------|--------------------------------------------------------------------|
| FP: CACC GTCAAGGTCAAATCATCGA<br>RP: AAAC TCGATGATTTTGACCTTGAC   | -                     | for designing sgRNA-1 of base editors to target VP64               |
| FP: CACC GTCGAGGTCAAAGTCATCAA<br>RP: AAAC TTGATGACTTTGACCTCGAC  | -                     | for designing sgRNA-2 of base editors to target VP64               |
| FP: CACC GACTTTGACCTCGACATGCT<br>RP: AAAC AGCATGTCGAGGTCAAAGTC  | -                     | for designing sgRNA-3 of base editors to target VP64               |
| FP: CACC GTCCAGGTCAAATCATCAA<br>RP: AAAC TTGATGATTTGACCTGGAC    | -                     | for designing sgRNA-4 of base editors to target VP64               |
| FP: CACC GGACGGGCTGACGCATTGGA<br>RP: AAAC TCCAATGCGTCAGCCCGTCC  | -                     | for designing sgRNA-5 of base editors to target VP64               |
| FP: CACC GCTGACGCATTGGACGATTT<br>RP: AAAC AAATCGTCCAATGCGTCAGC  | -                     | for designing sgRNA-6 of base editors to target VP64               |
| FP: CACC GATCTGGATATGCTGGGAAG<br>RP: AAAC CTTCCAGCATATCCAGATC   | -                     | for designing sgRNA-7 of base editors to target VP64               |
| FP: CACC GACCTTGACATGCTTGGTTC<br>RP: AAAC GAACCAAGCATGTCAAGGTC  | -                     | for designing sgRNA-8 of base editors to target VP64               |
| FP: CACC GCCCTTGATGACTTTGACCT<br>RP: AAAC AGGTCAAAGTCATCAAGGGC  | -                     | for designing sgRNA-9 of base editors to target VP64               |
| FP: CACC GACTTTGACCTCGACATGCT<br>RP: AAAC AGCATGTCGAGGTCAAAGTC  | -                     | for designing sgRNA-10 of base editors to target VP64              |
| FP: CACC GACCTCGACATGCTCGGCAG<br>RP: AAAC CTGCCGAGCATGTCGAGGTC  | -                     | for designing sgRNA-11 of base editors to target VP64              |
| FP: CACC GCCCTTGATGATTTGACCT<br>RP: AAAC AGGTCAAAGTCATCAAGGGC   | -                     | for designing sgRNA-12 of base editors to target VP64              |
| FP: CACC GTTAATCAGCATGTCCAGGT<br>RP: AAAC ACCTGGACATGCTGATTAAC  | -                     | for designing sgRNA-13 of base editors to target VP64              |
| FP: CACC GTCCAGGTCAAATCATCAA<br>RP: AAAC TTGATGATTTGACCTGGAC    | -                     | for designing sgRNA-14 of base editors to target VP64              |
| FP: CACC GAAATCATCAAGGGCGTCAC<br>RP: AAAC GTGACGCCCTTGATGATTTTC | -                     | for designing sgRNA-15 of base editors to target VP64              |
| FP: CACC GTCGAGGTCAAAGTCATCAA<br>RP: AAAC TTGATGACTTTGACCTCGAC  | -                     | for designing sgRNA-16 of base editors to target VP64              |
| FP: CACC GTCAAGGTCAAATCATCGA<br>RP: AAAC TCGATGATTTTGACCTTGAC   | -                     | for designing sgRNA-17 of base editors to target VP64              |
| FP: CACC GTCATCAAGGGCATCCGAAC<br>RP: AAAC GTTCGGATGCCCTTGATGAC  | -                     | for designing sgRNA-18 of base editors to target VP64              |
| FP: CACC GGCATCCGAACCAAGCATGT<br>RP: AAAC ACATGCTTGGTTCGGATGCC  | -                     | for designing sgRNA-19 of base editors to target VP64              |
| FP: CACC GAACCAAGCATGTCAAGGTC<br>RP: AAAC GACCTTGACATGCTTGGTTC  | -                     | for designing sgRNA-20 of base editors to target VP64              |
| FP: CACC GTCAAATCATCGAGGGCGT<br>RP: AAAC ACGCCCTCGATGATTTTGAC   | -                     | for designing sgRNA-21 of base editors to target VP64              |
| FP: CACC GTCACCTCCAGCATATCCA<br>RP: AAAC TGGATATGCTGGGAAGTGAC   | -                     | for designing sgRNA-22 of base editors to target VP64              |
| FP: CTGAACGCCCATCTGGACATCAC<br>RP: CGCTCCTGGACGTAGCCTTCG        | 1076                  | PCR VP64 from genomic DNA of CRISPRa-inserted cells for sequencing |
| FP: GACATCACCTACCGGAGTACCTG<br>RP: CGCTCCTGGACGTAGCCTTCG        | -                     | for sequencing VP64                                                |
| RP: CGCTCCTGGACGTAGCCTTCG                                       | -                     | for sequencing VP64                                                |

**Table S4. Primers used for pAAV-CMV-dSaCas9-ΔVP64 construction in luciferase reporter experiments**

| Primer sequence (5' to 3')<br>(forward, FP; reverse, RP)                           | Amplicon size (bp) | Description                                                                                                                                                             |
|------------------------------------------------------------------------------------|--------------------|-------------------------------------------------------------------------------------------------------------------------------------------------------------------------|
| FP: AAAA TCTAGA TCCGCGTTACATAACTTACGG<br>RP: AAAA ACCGGT AGCTCTGCTTATATAGACCTCCCA  | 508                | PCR CMV with added XbaI site<br>PCR CMV with added AgeI site                                                                                                            |
| FP: CACC GACTCGGGCGGGTTCGCGCGCCC<br>RP: AAAC GGGCGCGCGACCCGCCGAGTC                 | -                  | for designing sgRNA-1 of CRISPRa to target TK promoter                                                                                                                  |
| FP: CACC GCTCCTGCAGTCCCTCGCGCCT<br>RP: AAAC AGGCGCGAGGACTGCAGGAGC                  | -                  | for designing sgRNA-2 of CRISPRa to target TK promoter                                                                                                                  |
| FP: CACC GCGAGGACTGCAGGAGCTTCA<br>RP: AAAC TGAAGCTCCTGCAGTCCCTCGC                  | -                  | for designing sgRNA-3 of CRISPRa to target TK promoter                                                                                                                  |
| FP: CACC GCAAACGCGAGCAACGGGCCAC<br>RP: AAAC GTGGCCCGTTGCTCGCGTTTGC                 | -                  | for designing sgRNA-4 of CRISPRa to target TK promoter                                                                                                                  |
| FP: CACC GTTCAATTACAGCTCTTAAGGC<br>RP: AAAC GCCTTAAGAGCTGTAATTGAAC                 | -                  | for designing sgRNA-5 of CRISPRa to target TK promoter                                                                                                                  |
| FP: CACC GCCGCGGCGGCGACGGGCTCG<br>RP: AAAC CGAGCCCGTCGCCGCCGCGGC                   | -                  | for designing sgRNA-6 of CRISPRa to target TK promoter                                                                                                                  |
| FP: CACC GGAGACCTTCTGCGGGACGAG<br>RP: AAAC CTCGTCCCGCAGAAGGTCTCC                   | -                  | for designing sgRNA-7 of CRISPRa to target TK promoter                                                                                                                  |
| FP: CACC GCCCGACTGCATCTGCGTGT<br>RP: AAAC ACACGCAGATGCAGTCGGGGC                    | -                  | for designing sgRNA-8 of CRISPRa to target TK promoter                                                                                                                  |
| FP: CACC GCGCGCGACCCGCCGAGT<br>RP: AAAC ACTCGGGCGGGTCGCGCGCC                       | -                  | for designing sgRNA of CRISPR/Cas9 to knockout CRISPRa activity                                                                                                         |
| FP: AAAA GGATCC GGACGGGCTGACGCATTGG<br>RP: AAAA GAATTC TTA GTTAATCAGCATGTCCAGGTCCG | 168                | PCR VP64 with added BamHI site<br>PCR VP64 with added EcoRI site and stop codon<br>(only for PCR D1, M12, S13, D4, CA8.1, CA8.15, CA10.11, and CA18.14 of VP64 mutants) |
| FP: AAAA GGATCC GGACGGGCTGACGCATTGG<br>RP: AAAA GAATTC TTA GTTAATCAGCATGTCCGGGTCCG | 90 or 129          | PCR VP64 with added BamHI site<br>PCR VP64 with added EcoRI site and stop codon<br>(only for PCR M3 and S11 of VP64 mutants)                                            |
| FP: AAAA GGATCC GGACGGGCTGACGCATTGG<br>RP: AAAA GAATTC TTA GTTAATCAGCATGTTTAGGTCCG | 159 or 156         | PCR VP64 with added BamHI site<br>PCR VP64 with added EcoRI site and stop codon<br>(only for PCR S4 and S9 of VP64 mutants)                                             |
| FP: AAAA GGATCC GGACGGGCTGACGCATTGG<br>RP: AAAA GAATTC TTA GTTAATCAGCATGTCTAGGTTG  | 168                | PCR VP64 with added BamHI site<br>PCR VP64 with added EcoRI site and stop codon<br>(only for PCR S1 of VP64 mutant)                                                     |
| FP: AAAA GGATCC GGACGGGCTGACGCATTGG<br>RP: AAAA GAATTC TTA GTTAATCAGCATGTGCGGGTCCG | 134                | PCR VP64 with added BamHI site<br>PCR VP64 with added EcoRI site and stop codon<br>(only for PCR M5 of VP64 mutant)                                                     |
| FP: AAAA GGATCC GGACGGGCTGACGCATTGG<br>RP: AAAA GAATTC TTA GTTAATCAGCATGTGAGGGCGTC | 75                 | PCR VP64 with added BamHI site<br>PCR VP64 with added EcoRI site and stop codon<br>(only for PCR S2 of VP64 mutant)                                                     |
| FP: AAAA GGATCC GGACGGGCTGACGCATTGG<br>RP: AAAA GAATTC TTA GTTAATCAGCATGTTCAGGTCCG | 168                | PCR VP64 with added BamHI site<br>PCR VP64 with added EcoRI site and stop codon<br>(only for PCR A2 of VP64 mutant)                                                     |
| FP: AAAA GGATCC GGACGGGCTGACGCATTGG<br>RP: AAAA GAATTC TTA GTTAATCAGCATGTCCGGGTGG  | 168                | PCR VP64 with added BamHI site<br>PCR VP64 with added EcoRI site and stop codon<br>(only for PCR M6 of VP64 mutant)                                                     |
| FP: AAAA GGATCC GGACGGGCTGACGCATTGG<br>RP: AAAA GAATTC TTA GTTAATCAGCATGTGAGGTCCG  | 168                | PCR VP64 with added BamHI site<br>PCR VP64 with added EcoRI site and stop codon<br>(only for PCR A3 of VP64 mutant)                                                     |
| FP: GACATCACCTACCGCGAGTACCTG                                                       | -                  | for sequencing ΔVP64 in pAAV-CMV-dSaCas9-ΔVP64                                                                                                                          |

---

RP: CAGGGCGCGTACTATGTTGC

-

for sequencing  $\Delta$ VP64 and pU6-sgRNA in pAAV-CMV-dSaCas9-  
 $\Delta$ VP64

---

**Table S5. Primers used for pAAV-CMV-dSaCas9-ΔVP64 construction in endogenous gene modulation experiments**

| Primer sequence (5' to 3')<br>(forward, FP; reverse, RP)                           | Amplicon size (bp) | Description                                                                                                               |
|------------------------------------------------------------------------------------|--------------------|---------------------------------------------------------------------------------------------------------------------------|
| FP: AAAA TCTAGA TCCGCGTTACATAACTTACGG<br>RP: AAAA ACCGGT AGCTCTGCTTATATAGACCTCCCA  | 508                | PCR CMV with added XbaI site<br>PCR CMV with added AgeI site                                                              |
| FP: AAAA GGATCC GGACGGGCTGACGCATTGG<br>RP: AAAA GAATTC TTA GTTAATCAGCATGTTCCAGGTCC | 168                | PCR VP64 with added BamHI site<br>PCR VP64 with added EcoRI site and stop codon<br>(only for PCR A2 of VP64 mutant)       |
| FP: AAAA GGATCC GGACGGGCTGACGCATTGG<br>RP: AAAA GAATTC TTA GTTAATCAGCATGTTTAGGTCC  | 159                | PCR VP64 with added BamHI site<br>PCR VP64 with added EcoRI site and stop codon<br>(only for PCR S4 of VP64 mutants)      |
| FP: AAAA GGATCC GGACGGGCTGACGCATTGG<br>RP: AAAA GAATTC TTA GTTAATCAGCATGTCCAGGTCC  | 168                | PCR VP64 with added BamHI site<br>PCR VP64 with added EcoRI site and stop codon<br>(only for PCR CA10.11 of VP64 mutants) |
| FP: CACC GGGGGCAGGGGCGCCGAGGGCG<br>RP: AAAC CGCCCTCGGCGCCCTGCCCC                   | -                  | for designing sgRNA site-10 of CRISPRa to target human <i>KLOTHO</i> promoter                                             |
| FP: CACC GGC GCGCTCCGCTAGGGCCCGG<br>RP: AAAC CCGGGCCCTAGCGGAGCGCGCC                | -                  | for designing sgRNA site-11 of CRISPRa to target human <i>KLOTHO</i> promoter                                             |
| FP: CACC GGGAATTCGCCGTGCGCTGAA<br>RP: AAAC TTCAGCGCACGGCGAAGTTCCC                  | -                  | for designing sgRNA site-12 of CRISPRa to target human <i>KLOTHO</i> promoter                                             |
| FP: CACC GCGGGCCGCCCAATTTCCCGC<br>RP: AAAC GCGGAAATTGGGGCGGCCGCC                   | -                  | for designing sgRNA site-9 of CRISPRa to target human <i>SIRT6</i> promoter                                               |
| FP: CACC GCATGCGCCTTGCCGTGGGAGG<br>RP: AAAC CCTCCCACGGCAAGGCGCATGC                 | -                  | for designing sgRNA site-10 of CRISPRa to target human <i>SIRT6</i> promoter                                              |
| FP: CACC GGACAGCAGGGACCCAGCCT<br>RP: AAAC AGGCTGGGGTCCCTGCTGTCC                    | -                  | for designing sgRNA site-11 of CRISPRa to target human <i>SIRT6</i> promoter                                              |
| FP: CACC GCGTCAGCCCCGGCGGGGTG<br>RP: AAAC CACCCGCGCCGGGGCTGACGC                    | -                  | for designing sgRNA site-1 of CRISPRa to target human <i>NFE2L2</i> promoter                                              |
| FP: CACC GGGGCGGGAAGGGACTGCCAGC<br>RP: AAAC GCTGGCAGTCCCTTCCC GCCC                 | -                  | for designing sgRNA site-2 of CRISPRa to target human <i>NFE2L2</i> promoter                                              |
| FP: CACC GGGCAGTTGGCAGTGGCACGGT<br>RP: AAAC ACCGTGCCACTGCCAACTGCC                  | -                  | for designing sgRNA site-3 of CRISPRa to target human <i>NFE2L2</i> promoter                                              |
| FP: GCATATACGATACAAGGCTGTTAGAGAG                                                   | -                  | for sequencing pU6-sgRNA                                                                                                  |



**Table S6. Primers used for AAV titers**

| Primer sequence (5' to 3')<br>(forward, FP; reverse, RP) | Amplicon<br>size (bp) | Description                               |
|----------------------------------------------------------|-----------------------|-------------------------------------------|
| 6-FAM-CACCACGCCGAGGACGCCCTGA-ZEN/Iowa                    | -                     | probe specific to dSaCas9                 |
| FP: TCCATCAATGGCGGCTTCA<br>RP: GGCCTTGCCAGTTTCTTCCA      | 150                   | quantify the copies number of dSaCas9 DNA |

**Table S7. Primers used for qRT-PCR and TaqMan qPCR**

| Primer sequence (5' to 3')<br>(forward, FP; reverse, RP)   | Amplicon<br>size (bp) | Description                                       |
|------------------------------------------------------------|-----------------------|---------------------------------------------------|
| FP: ACCATCTTCCAGGAGCGAGA<br>RP: TGGCATGGACTGTGGTCATG       | 319                   | qPCR mRNA expression level of human <i>GAPDH</i>  |
| FP: ACCAAGAGAGATGATGCCAAATA<br>RP: CCACTCGAAACCATCCATGA    | 132                   | qPCR mRNA expression level of human <i>KLOTHO</i> |
| FP: CCCACGGAGTCTGGACCAT<br>RP: CTCTGCCAGTTTGTCCCTG         | 194                   | qPCR mRNA expression level of human <i>SIRT6</i>  |
| FP: CACATCCAGTCAGAAACCAAGTGG<br>RP: GGAATGTCTGCGCCAAAAGCTG | 112                   | qPCR mRNA expression level of human <i>NFE2L2</i> |
